# Supplementary material for: Covalent Conjugates of Allylbenzenes and Terpenoids as Antibiotics Enhancers with the Function of Prolonged Action
Source: MDPI journal article supplement (doi:10.3390/ph16081102), 2023-08-04

## Content

**Figure S1.** (a)  $^{13}\text{C}$  NMR spectra of MF-HPCD-PEI1.8-triMan. (b)  $^1\text{H}$  NMR spectra of Linalool-Br (product of HBr addition to linalool). (c)  $^{13}\text{C}$  NMR spectra of Linalool-Br (product of HBr addition to linalool). (d)  $^1\text{H}$  NMR spectra of EG-Br (product of HBr addition to EG). (e)  $^{13}\text{C}$  NMR spectra of EG-Br (product of HBr addition to EG).  $\text{D}_2\text{O}$ .  $T = 25\text{ }^\circ\text{C}$ .

**Figure S2.** HPLC diagrams for MF conjugates with polymers. Knauer chromatography system (Knauer, Berlin, Germany) on Diasfer-110-C18 column (BioChemMack, Moscow, Russia): grains –  $6\text{ }\mu\text{m}$ , size  $4\times 150\text{ mm}$ . The eluent was  $\text{CH}_3\text{CN}-\text{H}_2\text{O}$  (80:20, v:v); the elution rate was  $1\text{ mL/min}$ ,  $22\text{ }^\circ\text{C}$ . Detection was performed by MF absorption at  $290\text{ nm}$ .

**Figure S1.** (a)  $^{13}\text{C}$  NMR spectra of MF-HPCD-PEI1.8-triMan. (b)  $^1\text{H}$  NMR spectra of Linalool-Br (product of HBr addition to linalool). (c)  $^{13}\text{C}$  NMR spectra of Linalool-Br (product of HBr addition to linalool). (d)  $^1\text{H}$  NMR spectra of EG-Br (product of HBr addition to EG). (e)  $^{13}\text{C}$  NMR spectra of EG-Br (product of HBr addition to EG).  $\text{D}_2\text{O}$ .  $T = 25^\circ\text{C}$ .

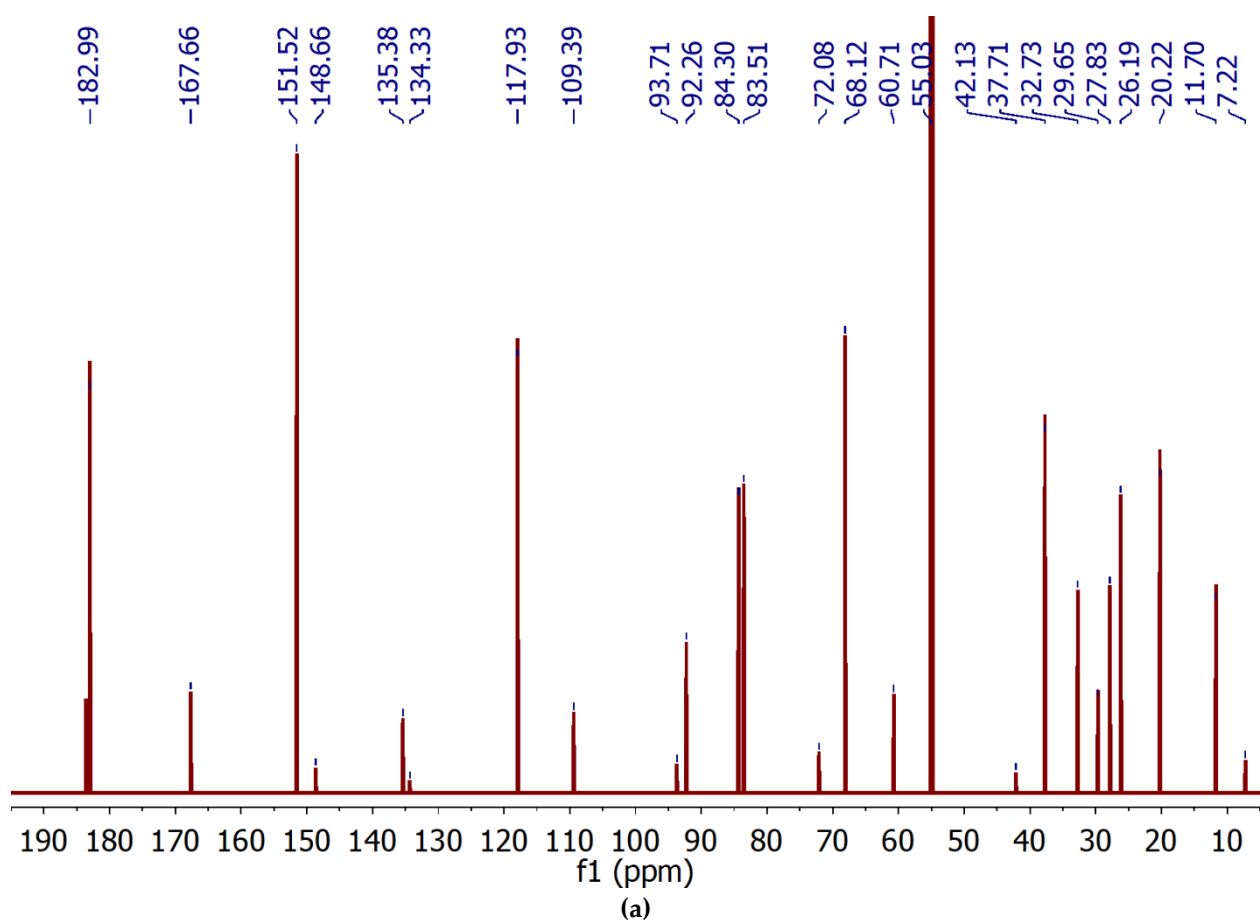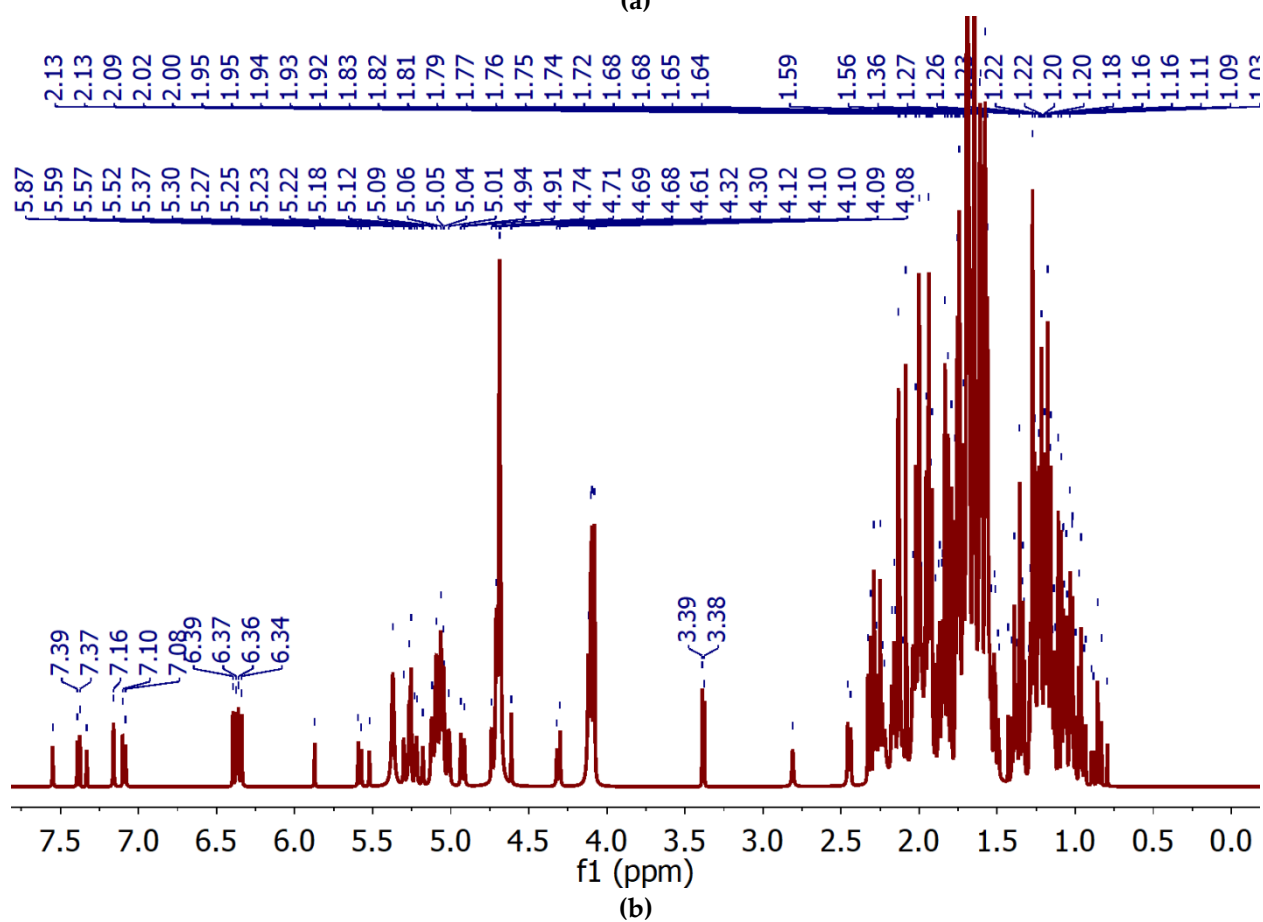

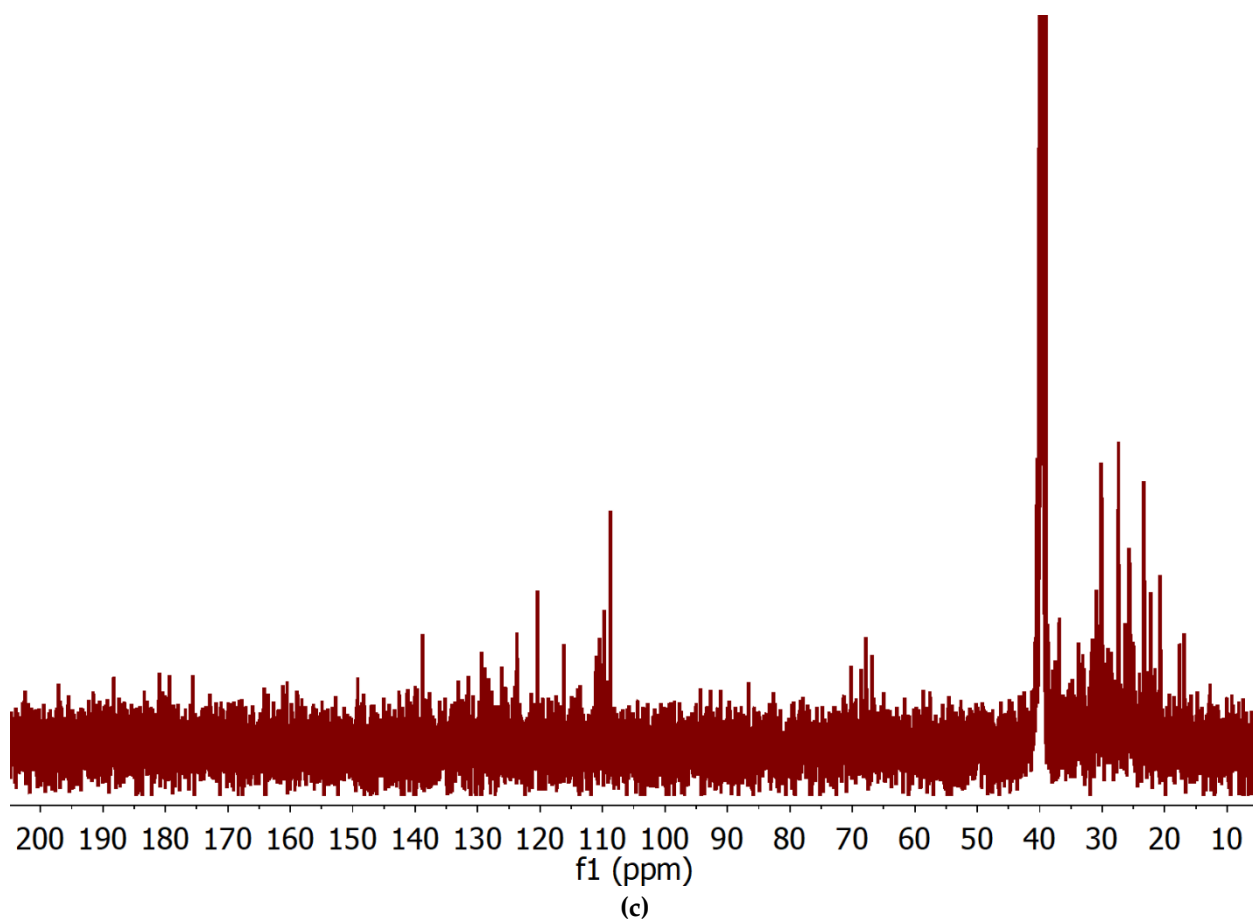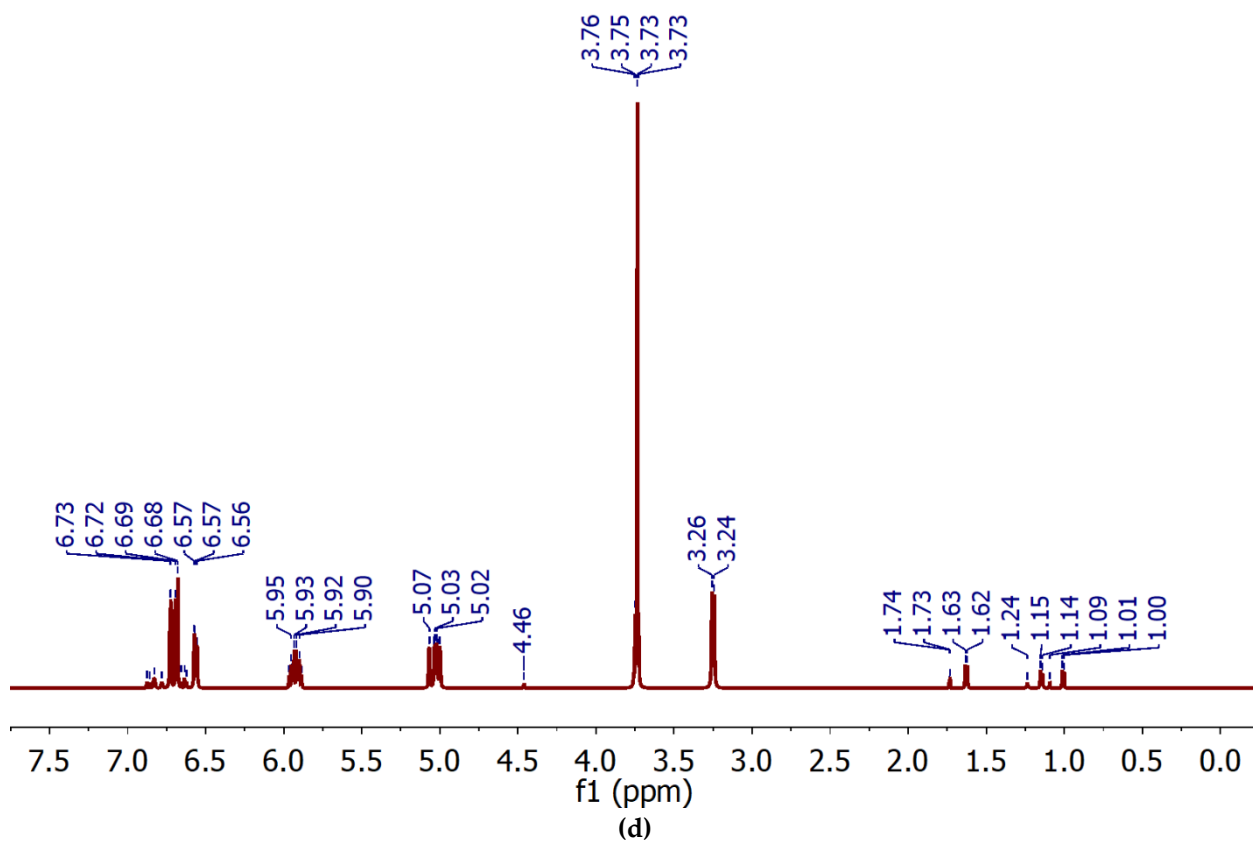

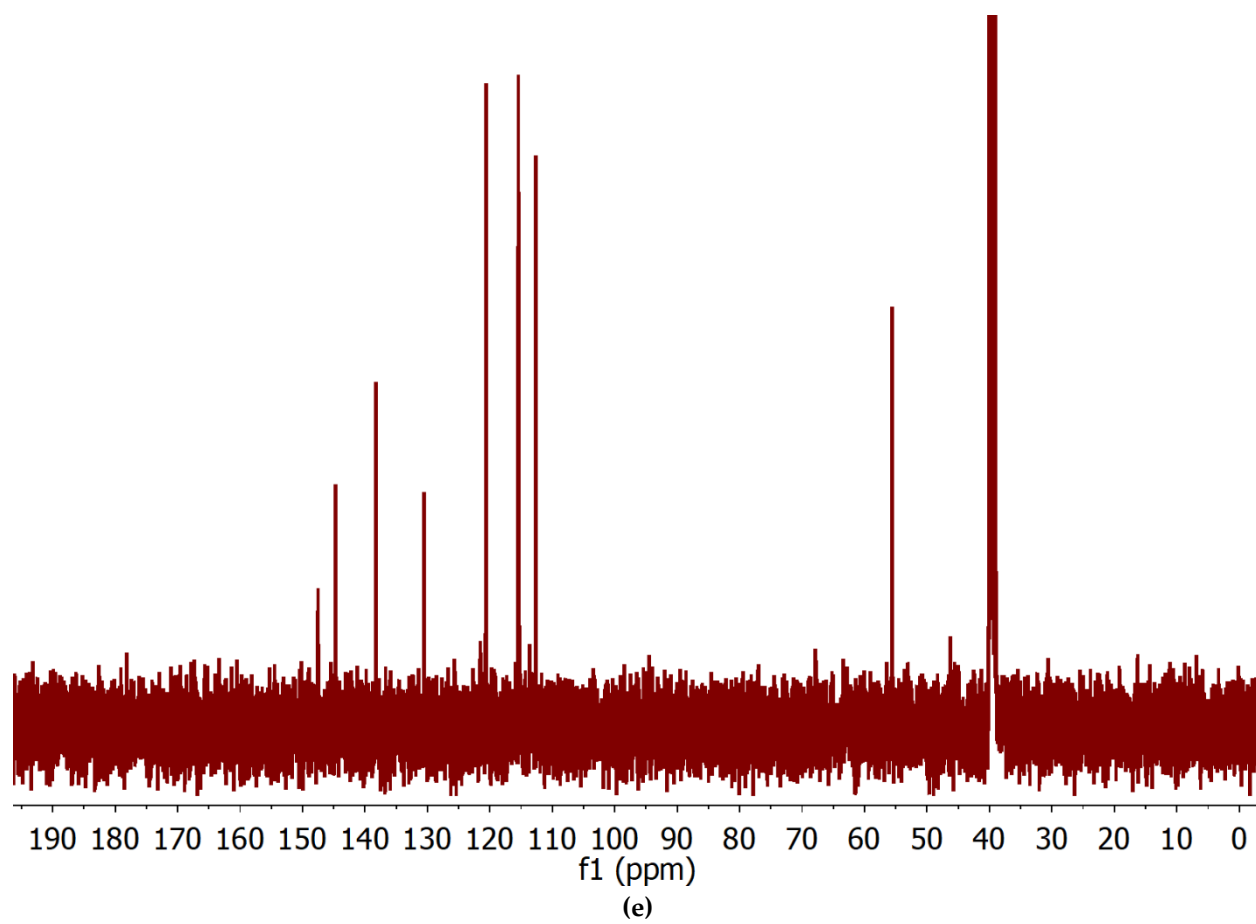

**Figure S2.** HPLC diagrams for MF conjugates with polymers. Knauer chromatography system (Knauer, Berlin, Germany) on Diasfer-110-C18 column (BioChemMack, Moscow, Russia): grains – 6  $\mu\text{m}$ , size 4 $\times$ 150 mm. The eluent was  $\text{CH}_3\text{CN-H}_2\text{O}$  (80:20, v:v); the elution rate was 1 mL/min, 22  $^\circ\text{C}$ . Detection was performed by MF absorption at 290 nm.

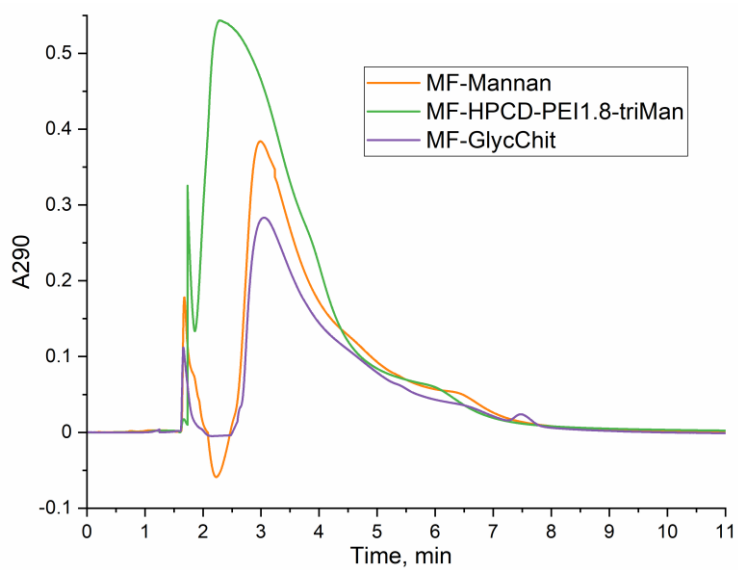

Supplement: s1 [file s1]
